# Supplementary material for: Novel mutation leading to splice donor loss in a conserved site of DMD causes cryptorchidism
Source: bioRxiv or medRxiv preprint supplement (doi:10.1101/2024.01.29.24301909), 2024-01-30

BCORL1  
NC\_000023.11:g.130028727G>A;  
NP\_001171701.1:p.(K1391R)

Human  
Chimpanzee  
Bonobo  
Gorilla  
Sumatran orangutan  
Gibbon  
Macaque  
Crab-eating macaque  
Pig-tailed macaque  
Sooty mangabey  
Olive baboon  
Drill  
Vervet-AGM  
Golden snub-nosed monkey  
Black snub-nosed monkey  
Capuchin  
Bolivian squirrel monkey  
White-tufted-ear marmoset  
Ma's night monkey  
Tarsier  
Coquerel's sifaka  
Greater bamboo lemur  
Mouse Lemur  
Bushbaby

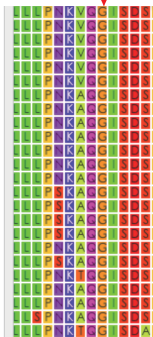

KDM6A  
NC\_000023.11:g.45069958A>C;  
NP\_001278345.1:p.(K775T)

Human  
Bonobo  
Chimpanzee  
Gorilla  
Sumatran orangutan  
Gibbon  
Macaque  
Pig-tailed macaque  
Olive baboon  
Vervet-AGM  
Drill  
Sooty mangabey  
Crab-eating macaque  
Golden snub-nosed monkey  
Bolivian squirrel monkey  
Capuchin  
White-tufted-ear marmoset  
Ma's night monkey  
Coquerel's sifaka  
Mouse Lemur  
Greater bamboo lemur  
Bushbaby

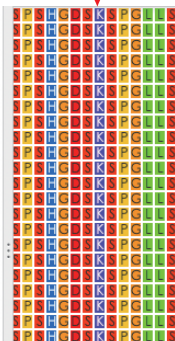

KDM6A  
NC\_000023.11:g.45110152A>G;  
NP\_001278344.1:p.(D1412G)

Human  
Bonobo  
Chimpanzee  
Gorilla  
Sumatran orangutan  
Gibbon  
Macaque  
Pig-tailed macaque  
Olive baboon  
Vervet-AGM  
Drill  
Sooty mangabey  
Crab-eating macaque  
Golden snub-nosed monkey  
Bolivian squirrel monkey  
Capuchin  
White-tufted-ear marmoset  
Ma's night monkey  
Coquerel's sifaka  
Mouse Lemur  
Greater bamboo lemur  
Bushbaby

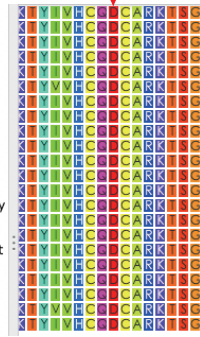

UBA1  
NC\_000023.11:g.47212835A>T;  
NP\_003325.2:p.(Y873F)

Human  
Chimpanzee  
Bonobo  
Gorilla  
Sumatran orangutan  
Gibbon  
Sooty mangabey  
Drill  
Olive baboon  
Macaque  
Crab-eating macaque  
Pig-tailed macaque  
Vervet-AGM  
Golden snub-nosed monkey  
Black snub-nosed monkey  
White-tufted-ear marmoset  
Capuchin  
Bolivian squirrel monkey  
Ma's night monkey  
Tarsier  
Mouse Lemur  
Greater bamboo lemur  
Coquerel's sifaka  
Bushbaby

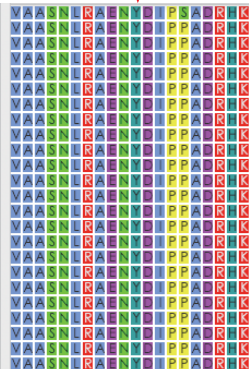

UBA1  
NC\_000023.11:g.47214843G>C;  
NP\_695012.1:p.(V1031L)

Human  
Chimpanzee  
Bonobo  
Gorilla  
Sumatran orangutan  
Gibbon  
Sooty mangabey  
Drill  
Olive baboon  
Macaque  
Pig-tailed macaque  
Vervet-AGM  
Golden snub-nosed monkey  
Black snub-nosed monkey  
Capuchin  
Bolivian squirrel monkey  
Ma's night monkey  
Tarsier  
Mouse Lemur  
Greater bamboo lemur  
Coquerel's sifaka  
Bushbaby

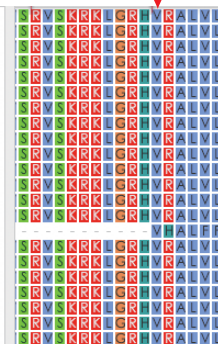

USP9Y  
NC\_000024.10:g.12739592C>G;  
NP\_004645.2:p.(S462C)

Human  
Chimpanzee  
Golden snub-nosed monkey  
Macaque  
Crab-eating macaque  
Olive baboon  
Capuchin  
Greater bamboo lemur

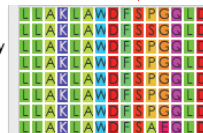

USP9Y Y-12722148-G-A  
ENST00000338981.7:c.286G>A;  
ENSP00000342812.3:p.Glu96Lys

Human  
Chimpanzee  
Golden snub-nosed monkey  
Macaque  
Crab-eating macaque  
Olive baboon  
Capuchin  
Greater bamboo lemur

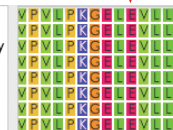

Supplement: Supplementary file [file media-2.pdf]
