# Supplementary material for: Novel mutation leading to splice donor loss in a conserved site of DMD causes cryptorchidism
Source: bioRxiv or medRxiv preprint supplement (doi:10.1101/2024.01.29.24301909), 2024-01-30

ARSH X-3024049-G-C  
ENST00000381130.3:c.930G>C;  
ENSP00000370522.3:p.Glu310Asp

ARSH X-3024093-G-C  
ENST00000381130.3:c.974G>C;  
ENSP00000370522.3:p.Gly325Ala

ARSH X-3033050-C-G  
ENST00000381130.3:c.1354C>G;  
ENSP00000370522.3:p.Pro452Ala

Human  
Bonobo  
Gorilla  
Sumatran orangutan  
Gibbon  
Macaque  
Crab-eating macaque  
Drill  
Olive baboon  
Sooty mangabey  
Vervet-AGM  
Black snub-nosed monkey  
Golden snub-nosed monkey  
Bolivian squirrel monkey  
Capuchin  
Ma's night monkey  
Coquerel's sifaka  
Greater bamboo lemur  
Mouse Lemur

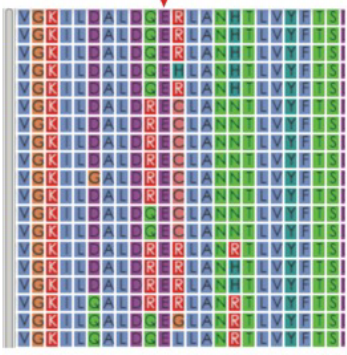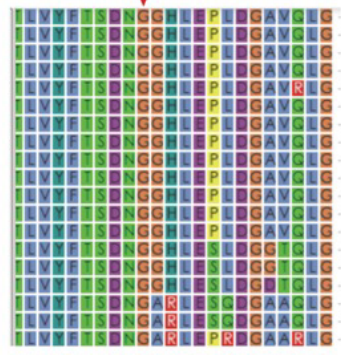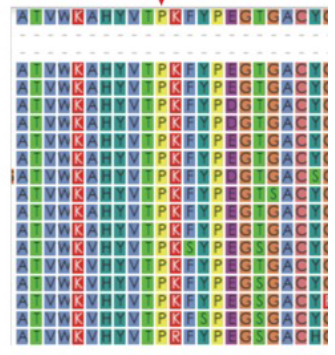

DMD: X-31774145-C-T  
ENST00000357033.9:c.7357G>A;  
ENSP00000354923.3:p.Glu2453Lys

DMD: X-32342234-G-A  
ENST00000378677.6:c.5776C>T;  
ENSP00000367948.2:p.Arg1926Cys

DMD: X-32346044-G-C  
ENST00000358062.7:c.331C>G;  
ENSP00000350765.3:p.Gln111Glu

Human  
Chimpanzee  
Bonobo  
Gorilla  
Sumatran orangutan  
Gibbon  
Olive baboon  
Crab-eating macaque  
Macaque  
Pig-tailed macaque  
White-tufted-ear marmoset  
Capuchin  
Bolivian squirrel monkey  
Mouse Lemur  
Greater bamboo lemur  
Bushbaby

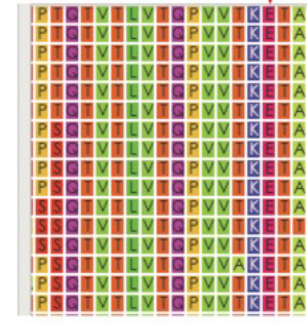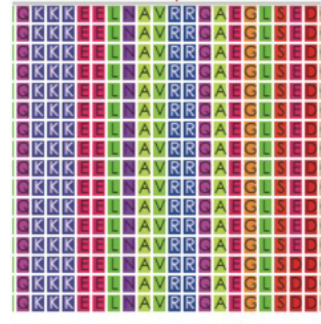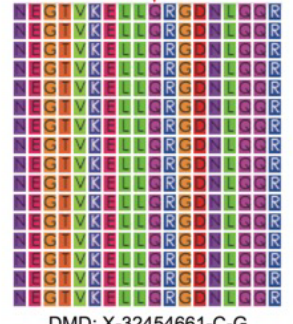

DMD: X-32454661-C-G  
ENST00000357033.9:c.3603+1G>C

DMD: X-32472199-A-G  
ENST00000357033.9:c.2914T>C;  
ENSP00000354923.3:p.Tyr972His

DMD: X-32573783-C-T  
ENST00000288447.9:c.1642G>A;  
ENSP00000288447.4:p.Asp548Asn

Human  
Bonobo  
Chimpanzee  
Gorilla  
Sumatran orangutan  
Gibbon  
Sooty mangabey  
Drill  
Olive baboon  
Crab-eating macaque  
Macaque  
Pig-tailed macaque  
Vervet-AGM  
Black snub-nosed monkey  
Golden snub-nosed monkey  
Ma's night monkey  
White-tufted-ear marmoset  
Capuchin  
Tarsier  
Mouse Lemur  
Greater bamboo lemur  
Coquerel's sifaka  
Bushbaby

TTTT-TTTTACCTTCATCTCT  
-----TTTTACCTTCATCTCT  
-----TTTTACCTTCATCTCT  
-----TTTTACCTTCATCTCT  
-----TTTTACCTTCATCTCT  
-CTT-TTTTACCTTCATCTCT  
-CTT-TTTTACCTTCATCTCT  
TTTT-----ACCTTCATCTCT  
-----TTTTACCTTCATCTCT  
-CTT-TTTTACCTTCATCTCT  
-----TTTTACCTTCATCTCT  
-CTT-TTTTACCTTCATCTCT  
TTTT-----ACCTTCATCTCT  
-TT-ATTTTACCTTCATCTCT  
-----ATTTTACCTTCATCTCT  
-----TTTTACCTTCATCTCT  
-----TTTACCTTCATCTCT  
-TTT-GTTTACCTTCATCTCT

Human  
Chimpanzee  
Bonobo  
Gorilla  
Sumatran orangutan  
Gibbon  
Olive baboon  
Crab-eating macaque  
Macaque  
Pig-tailed macaque  
White-tufted-ear marmoset  
Capuchin  
Bolivian squirrel monkey  
Mouse Lemur  
Greater bamboo lemur  
Bushbaby

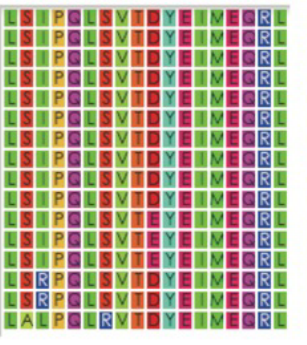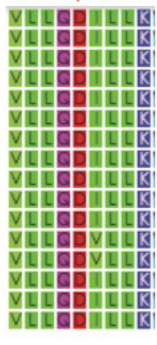

MAGEA4 X-151924064-G-A  
ENST00000276344.6:c.400G>A;  
ENSP00000276344.2:p.Ala134Thr

MAGEA4 X-151924194-A-T  
ENST00000682728.1:c.530A>T;  
ENSP00000507816.1:p.Tyr177Phe

Human  
Gorilla  
Chimpanzee  
Bonobo  
Sumatran orangutan  
Black snub-nosed monkey  
Sooty mangabey  
Olive baboon  
Macaque  
Pig-tailed macaque  
Capuchin  
White-tufted-ear marmoset

SHROOM2 X-9786618-C-A  
ENST00000380913.8:c.73C>A;  
ENSP00000370299.3:p.Arg25Ser

Crab-eating macaque  
Macaque  
Olive baboon  
Vervet-AGM  
Chimpanzee  
Chimpanzee  
Human  
Sumatran orangutan  
White-tufted-ear marmoset

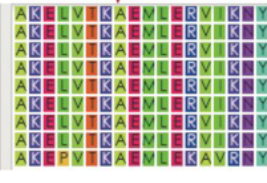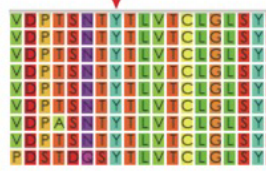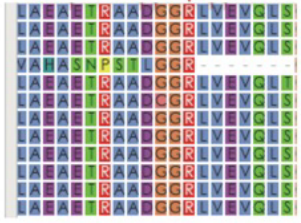

SHROOM2 X-9894590-G-A  
ENST00000380913.8:c.682G>A;  
ENSP00000370299.3:p.Asp228Asn

SHROOM2 X-9937394-C-T  
ENST00000418909.6:c.353C>T;  
ENSP00000415229.3:p.Pro118Leu

SHROOM2 X-9937537-G-T  
ENST00000452575.1:c.496G>T;  
ENSP00000406724.1:p.Ala166Ser

Human  
Gorilla  
Chimpanzee  
Bonobo  
Sumatran orangutan  
Black snub-nosed monkey  
Sooty mangabey  
Olive baboon  
Macaque  
Pig-tailed macaque  
Capuchin  
White-tufted-ear marmoset  
Ma's night monkey  
Mouse Lemur

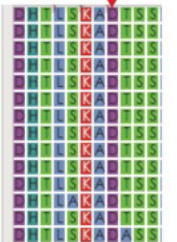

Human  
Gorilla  
Chimpanzee  
Bonobo  
Sumatran orangutan  
Black snub-nosed monkey  
Sooty mangabey  
Olive baboon  
Macaque  
Pig-tailed macaque  
Capuchin  
White-tufted-ear marmoset  
Ma's night monkey

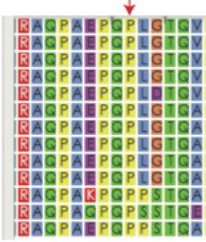

Human  
Gorilla  
Chimpanzee  
Bonobo  
Sumatran orangutan  
Black snub-nosed monkey  
Sooty mangabey  
Olive baboon  
Macaque  
Pig-tailed macaque  
Capuchin  
White-tufted-ear marmoset  
Ma's night monkey  
Bushbaby

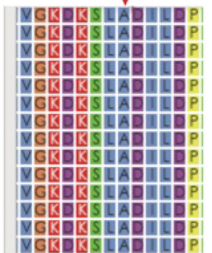

Supplement: Supplementary file [file media-4.pdf]
