# Supplementary material for: Novel mutation leading to splice donor loss in a conserved site of DMD causes cryptorchidism
Source: bioRxiv or medRxiv preprint supplement (doi:10.1101/2024.01.29.24301909), 2024-01-30

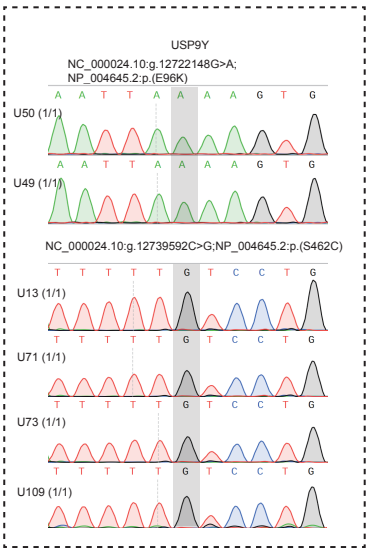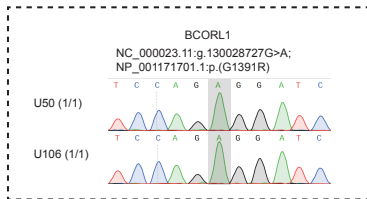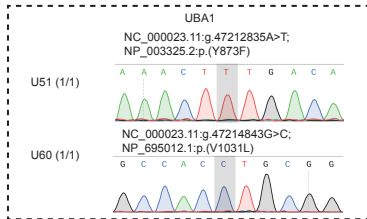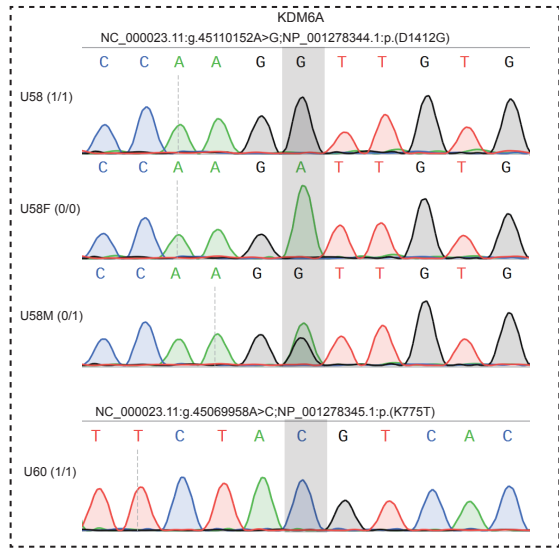

Supplement: Supplementary file [file media-3.pdf]
